# Supplementary material for: Genome-Wide Identification and Characterization of bZIP Transcription Factors in Brassica oleracea under Cold Stress
Source: Biomed Res Int. 2016 May 23;2016:4376598. doi: 10.1155/2016/4376598 (PMC4893578; doi:10.1155/2016/4376598)
Supplement: Supplementary file 1 — The supplementary materials contain 5 files, they are some important data supported to the methods and results of the presented study. These data make paper easier to read and understand. [file 4376598.f1.zip]

Archive with 5 entries (5 files):
- Table S3_BolbZIP number in Chromosome.xlsx
- Table S4_BolbZIP group.xlsx
- Table S5_BolbZIP group 11.xlsx
- Table S1_BolbZIP_Primer information.xlsx
- Table S2_Consensus sequence for finding bZIP domain.xlsx
