# Supplementary material for: Genome-Wide Identification and Characterization of bZIP Transcription Factors in Brassica oleracea under Cold Stress
Source: Biomed Res Int. 2016 May 23;2016:4376598. doi: 10.1155/2016/4376598 (PMC4893578; doi:10.1155/2016/4376598)
Supplement: Supplementary file 1 — The supplementary materials contain 5 files, they are some important data supported to the methods and results of the presented study. These data make paper easier to read and understand. [file 4376598.f1.zip › Table S1_BolbZIP_Primer information.xlsx]

## Sheet: Primer sequence
Gene name	Primer name	Sequence (5'-3')
Bol000879	Bol000879F	TACAACTCAGCTATGGCTGCTGCAT
	Bol000879R	TCTTCATCAGCCCATTCTCTGTGT
Bol001886	Bol001886F	AGTAACAACTCCGGCGATAGCTCCAGCA
	Bol001886R	AGAAGCAGACGCTGGTGATCCAAGA
Bol004832	Bol004832F	AGTGTCAGTGTTATCGCCAAGAGTTGC
	Bol004832R	ATTAGCTACGGTTCCTGTGGCCTGTA
Bol005115	Bol005115F	GCGAGATGCACTCAACGACCAGCTGA
	Bol005115R	GCTAGAAGTAGCGTGGTGCATAAGCT
Bol006077	Bol006077F	AGACTGAGTGTGCAGCTACTGTTGTA
	Bol006077R	ACCGCCTAGCTGACTCTCGATTTGA
Bol006902	Bol006902F	ACATGACAAGAACGGAAGCAGTGGTA
	Bol006902R	ACAATATCTCCTCCTGATGGAGCCA
Bol008040	Bol008040F	ACTCGACCGTGCTAGACAACAGGG
	Bol008040R	CCACAAGAAGAACCGTTCTGCAGAAG
Bol008071	Bol008071F	CTGTCCTGATATGGAAGACAGACCT
	Bol008071R	CAATGGTGCATAACGTACCGGAGC
Bol009713	Bol009713F	GGATGCTAGAGCAGATGCAGATGATA
	Bol009713R	TGCAAGTTCCTGCTCGAGCTGTGAT
Bol010390	Bol010390F	CCAGCGGAACTCACTGGATACTTCC
	Bol010390R	TGTTGGTGATCGTCGTCTGATGTTGA
Bol011470	Bol011470F	GGTGCGCCTCATGAAGTCTGGAACGA
	Bol011470R	TCAGTTGATCCAATAAAGCTTGGTTCT
Bol011719	Bol011719F	AGAGATGATGTCTGAACGAGAAGT
	Bol011719R	ATGACTCGGTGGAACGGGATGTGA
Bol012472	Bol012472F	ATCCGAACGCCGTCGCCGTTGACGA
	Bol012472R	ATCCACAGCCGTCGATCATATCGA
Bol013712	Bol013712F	ACACTCACAGCCACACGTGCTTCCA
	Bol013712R	CCAAGGCACTCTGACTCTGCAGCC
Bol014051	Bol014051F	ACCTCCGGATGAGAGAGAGCTTAAGC
	Bol014051R	TCAACAAGAAGCTCTTCGTATTGGCT
Bol016432	Bol016432F	ACACAACAGTTTCGTACTGCTGGAACA
	Bol016432R	CTCGAGTTCTGTCCAGAGATGGTGAT
Bol016607	Bol016607F	ATCAGCTAGAAGGTCGCGTCTGAAGA
	Bol016607R	GCTATTTCCACGTTTACGTTCTCGTC
Bol018596	Bol018596F	TGATGACATCAAACCCGGTTCTGAT
	Bol018596R	TGATTCCCGGTTCGATTCCATCCTCT
Bol018688	Bol018688F	CCTTGGTTCCATCCACAGCCAACAT
	Bol018688R	TCAAAGCCGGCTCCAGAATTCAAGCT
Bol020032	Bol020032F	AGCTGAACCGTGTATCGGAGACTCA
	Bol020032R	TCATTCCGATAACTTTCTTACAAAGT
Bol021255	Bol021255F	ATCTACAATCACCAGGCAACAACTCTA
	Bol021255R	CTTGTGCTTCCTCCAAGCTTCTTCA
Bol022925	Bol022925F	AGGAGAGTGATGAAGAGTTGTCGA
	Bol022925R	GTTGAGCAGATACTCGGTTTCTCA
Bol024526	Bol024526F	GGGGCAATGGCGTTTGATGCAGAGT
	Bol024526R	TCAATGGCTCCACCTGACTCGCTAT
Bol026864	Bol026864F	ACCACTAGCGAAGGAGCTTCTGCCA
	Bol026864R	TGAAGAATCATCGGTATGGTGCCCGT
Bol027526	Bol027526F	ATTCAGCAGTGTTGGATGGATCTTCA
	Bol027526R	ATTGCCAATAGTATCTGAATAGTGA
Bol027732	Bol027732F	TCGGAGTCCGATCTCGTGCAACGT
	Bol027732R	TAGCTCGGTCACCTGAGCTCTCAT
Bol028894	Bol028894F	ACCGGAATAAGCTGATTCAACCGGA
	Bol028894R	ACCGGAGCATCTCTTGTTCCGTCA
Bol028975	Bol028975F	TCTGGGAACGATGGTGTATCTCACAGT
	Bol028975R	TCATCCTTCACAGGTACACCAGCCT
Bol029939	Bol029939F	ACAAGCCTCAGTGGCGATGCCACCA
	Bol029939R	TCTTGATCATACGCTTATGATGTCTAT
Bol030865	Bol030865F	ACTCGAGTTCTTCTCCTTCCCC
	Bol030865R	TCAGTGATTTTCATCGGCTTTAGGCC
Bol032354	Bol032354F	AGTTCAGGTTCCGACATAGACGAGA
	Bol032354R	AGCGAGTCAAGCCTCCGTCTCGCCA
Bol033132	Bol033132F	AGTGCTACTAACAATCCACAATCCA
	Bol033132R	TCAAGTAACTGATGGTTCTCGACCCT
Bol033493	Bol033493F	TCAGCTAGTGACACATCTGCCTACT
	Bol033493R	TACTTACTTGTGTTTCAGCTGATTTCG
Bol033853	Bol033853F	TGCAGAGACAAGGTTCAATTGCCT
	Bol033853R	TCACTGTGACTCCATAAGGCTGGT
Bol034371	Bol034371F	ATTCAAGAACTCAATAATCTACAATCTCCA
	Bol034371R	CTACCACGGAAACTTGTGCTTCCC
Bol034676	Bol034676F	ACGGCTCAGGTTAACCGGCTTAAAGA
	Bol034676R	ATCATCAGGCTCTGGACCAGTCAGG
Bol037334	Bol037334F	ACCGGTCTGGTCCAGACGTTGTTCCA
	Bol037334R	AGCTCCGGTCGATCTGATGCAACATCA
Bol037733	Bol037733F	ATGGTCCGGTAGAGAAGGTGGTTGA
	Bol037733R	GCTTTAGGTAACTTCGGTTGTGCTCTA
Bol037803	Bol037803F	ACTCTGGATCTGGACAACACGACGGGA
	Bol037803R	ATTCAACACCTCCGCGCGTTGTGCA
Bol038660	Bol038660F	ACGAGGAGGAGTTGTTGATGGTTCTTGA
	Bol038660R	TGATTCCATATCACCCACATACACT
Bol039895	Bol039895F	ACGTGATCTACTCGACGAGCGGAAGA
	Bol039895R	ACAAAGTCGACGATCTCGTTGAGGG
Bol041035	Bol041035F	TCAACGAGTCTTATGTCTGGGAGT
	Bol041035R	TGCAGGTGAACTTGTTGCTCCACAGT
Bol041488	Bol041488F	GGAAACGCAAGAGAATGCTATCGA
	Bol041488R	CCCAATGATTAACGCCACTCATCATC
Bol042729	Bol042729F	ACTCAACTTCCGACGAAGATCATCATTA
	Bol042729R	TACGTTATCCTGAGTCTCCAATACGCT
Bol043589	Bol043589F	TCAGGACCAGACACAAGCAACGGT
	Bol043589R	CAGCGTTAGAACCACCGCTTCCCCTC
Bol043707	Bol043707F	TCTATGCGAGTAAACGTGTAGATACT
	Bol043707R	CGAGTTCCCCAGCTGCTACACTCTCT
Bol044598	Bol044598F	ACAGAGAGTCAGCTCGGAGATCGAGGA
	Bol044598R	CCAAGGGTTAATCTCAGGAATATCCA
Actin	BolactinF	GCTATGTATGTCGCTATTC
	BolactinR	TTGGAAGTCTCCATCTC
