# Supplementary material for: Genome-Wide Identification and Characterization of bZIP Transcription Factors in Brassica oleracea under Cold Stress
Source: Biomed Res Int. 2016 May 23;2016:4376598. doi: 10.1155/2016/4376598 (PMC4893578; doi:10.1155/2016/4376598)
Supplement: Supplementary file 1 — The supplementary materials contain 5 files, they are some important data supported to the methods and results of the presented study. These data make paper easier to read and understand. [file 4376598.f1.zip › Table S2_Consensus sequence for finding bZIP domain.xlsx]

## Sheet: Sheet1
Gene	Organism	Consensus sequence
EMP1	Triticum aestivum	ERELKRERRKQSNRESARRSRLRKQQECEELAQKVSELTAANGTLRSELDQLKKDCKTMETENKK
HBPA	Triticum aestivum	ERELKKQKRKLSNRESARRSRLRKQAECEELGQRAEALKSENSSLRIELDRIKKEYEELLSKNTS
CPR1	Petroselinum crispum	DRDLKRERRKQSNRESARRSRLRKQAEAEELAIKVDSLTAENMALKAEINRLTLTAEKLTNDNSR
CPR2	Petroselinum crispum	PSDAKRVRRMLSNRESARRSRRRKQAHMTELETQVSQLRVENSSLLKRLTDISQRYNDAAVDNRV
CPR3	Petroselinum crispum	ERELKRQRRKQSNRESARRSRLRKQAKSDELQERLDNLSKENRILRKNLQRISEACAEVTSENHS
GBF4	Arabidopsis thaliana	KAAAQRQKRMIKNRESAARSRERKQAYQVELETLAAKLEEENEQLLKEIEESTKERYKKLMEVLI
ABI5	Arabidopsis thaliana	KVVERRQRRMIKNRESAARSRARKQAYTVELEAELNQLKEENAQLKHALAELERKRKQQYFESLK
OCS1	Zea mays	ADTHRREKRRLSNRESARRSRLRKQQHLDELVQEVARLQADNARVAARARDIASQYTRVEQENTV
OP2	Zea mays	MPTEERVRKKESNRESARRSRYRKAAHLKELEDQVAQLKAENSCLLRRIAALNQKYNDANVDNRV
