# Supplementary material for: Genome-Wide Identification and Characterization of bZIP Transcription Factors in Brassica oleracea under Cold Stress
Source: Biomed Res Int. 2016 May 23;2016:4376598. doi: 10.1155/2016/4376598 (PMC4893578; doi:10.1155/2016/4376598)
Supplement: Supplementary file 1 — The supplementary materials contain 5 files, they are some important data supported to the methods and results of the presented study. These data make paper easier to read and understand. [file 4376598.f1.zip › Table S3_BolbZIP number in Chromosome.xlsx]

## Sheet: Sheet1
Chromosome	Gene number in B.oleracea	Gene distribution (%)	Gene number in B.rapa (Hwang et al.*)	Gene distribution (%)
C01	14	11.7647	11	8.08824
C02	12	10.084	13	9.55882
C03	15	12.605	14	10.2941
C04	23	19.3277	13	9.55882
C05	8	6.72269	11	8.08824
C06	7	5.88235	17	12.5
C07	10	8.40336	9	6.61765
C08	12	10.084	11	8.08824
C09	11	9.2437	28	20.5882
C10	━	━	8	5.88235
Scafold	7	5.88235	1	0.735294
Total	119	100	136	100
*See refrence "Hwang et al. (2014) Genomics 104:194-202"
