# Supplementary material for: Genome-Wide Identification and Characterization of bZIP Transcription Factors in Brassica oleracea under Cold Stress
Source: Biomed Res Int. 2016 May 23;2016:4376598. doi: 10.1155/2016/4376598 (PMC4893578; doi:10.1155/2016/4376598)
Supplement: Supplementary file 1 — The supplementary materials contain 5 files, they are some important data supported to the methods and results of the presented study. These data make paper easier to read and understand. [file 4376598.f1.zip › Table S4_BolbZIP group.xlsx]

## Sheet: Bol
			Brassica rapa	Arabidopsis
	BRAD		Closest homologous	Closest homologous	Published name
Group	gene ID	Classified domain	(homology (%)/group)	(homology (%)/group)	(Arabidopsis)
Group 1A	Bol003614	Q-rich domain	Bra001742 (80/1B)	At3g19290 (72/1A)	ABF4/AREB2
	Bol005115	Q-rich domain	Bra016980 (92/1A)	At2g40620 (83/1A)
	Bol006882	Q-rich domain	Bra004582 (98/1A)	At2g40620 (79/1A)
	Bol013623	Q-rich domain	Bra011485 (89/1A)	At4g34000 (75/1A)	ABF3
	Bol018521	Q-rich domain	Bra033582 (75/11)	At4g38900 (57/1A)
	Bol020604	Q-rich domain	Bra000195 (88/1A)	At2g40620 (66/1A)
	Bol023333	Q-rich domain	Bra030637 (82/1A)	At1g06070 (74/1A)
	Bol031002	Q-rich domain	Bra037533 (88/1A)	At3g19290 (74/1A)	ABF4/AREB2
	Bol041035	Q-rich domain	Bra015471 (95/1A)	At1g06070 (77/1A)
Group 1B	Bol016788	(QAQQPHQQQLQQPHQ)	Bra018800 (87/1B)	At1g49720 (61/1A)	ABF1
	Bol018596	(MRRILMIRQLQQQQQ)	Bra017850 (95/1B)	At4g37730 (70/11)
	Bol028894	(RRILILRQLQQQQQ)	Bra011780 (94/1B)	At4g37730 (72/11)
	Bol033493	(QQQPQQNQKQMQQ)	Bra034913 (97/1B)	At1g35490 (71/1A)
Group 3A	Bol000879	P-rich domain	Bra004550 (95/3A)	At2g46270 (75/3A)	GBF3
	Bol006736	P-rich domain	Bra031172 (93/3A)	At2g21230 (58/5A)
	Bol011470	P-rich domain	Bra037382 (95/3A)	At4g01120 (69/3A)	GBF2
	Bol014051	P-rich domain	Bra005335 (66/3A)	At1g32150 (68/3A)
	Bol017742	P-rich domain	Bra004550 (80/3A)	At2g46270 (70/3A)	GBF3
	Bol022259	P-rich domain	Bra023243 (85/3A)	At1g32150 (70/3A)
	Bol027451	P-rich domain	Bra005335 (96/3A)	At2g35530 (83/3A)
	Bol028975	P-rich domain	Bra011701 (96/3A)	At4g36730 (82/3A)	GBF1
	Bol039799	P-rich domain	Bra023012 (85/3A)	At2g35530 (73/3A)
	Bol043246	P-rich domain	Bra032191 (99/3A)	At1g43700 (69/11)	VIP1
	Bol045877	P-rich domain	Bra031173 (85/3A)
	Bol045878	P-rich domain	Bra031172 (90/3A)	At2g21230 (50/5A)
Group 4A	Bol009713	N-rich domain	Bra031364 (97/4A)	At1g22070 (88/11)	TGA3
	Bol034371	N-rich domain	Bra006324 (93/4A)	At5g15830 (75/4A)
	Bol045190	N-rich domain	Bra040260 (87/11)	At1g45249 (51/1A)	ABF2/AREB1
Group 4B	Bol021255	(HLNHYYNNLNPSTNINNLNLIP)	Bra023540 (97/4B)	At5g15830 (75/4A)
	Bol030487	(LNHYYNNLNPSNNNPNLIPYP)	Bra008670 (93/4B)	At5g15830 (75/4A)
Group 5A	Bol006735	S-rich domain	Bra030312 (86/3A)
	Bol023356	S-rich domain	Bra030663 (96/5A)	At1g06850 (80/5A)
	Bol040859	S-rich domain	Bra015282 (93/5A)	At1g03970 (64/5A)	GBF4
Group 5B	Bol006734	(SSSIGSGSSQPSSVFSG)	Bra030310 (94/11)
	Bol012472	(SSSSTYRSSSSS)	Bra024478 (97/5B)	At2g18160 (79/5B)	GBF5
	Bol022925	(MSLQRPNGNSSSSSS)	Bra001671 (97/5B)	At3g17609 (92/5B)	HYH
	Bol024237	(SSSSGTTSSTIQTSS)	Bra017664 (97/5B)	At4g34590 (82/5B)	ATB2/GBF6
	Bol024704	(SSLPSSSERSSSS)	Bra023317 (96/5A)	At5g11260 (84/5B)	HY5
	Bol029042	(SSISSSSSPLHSSQDS)	Bra010504 (70/11)	At4g35900 (62/5A)	FD-1
	Bol030865	(SSSSPSPKKQKTEESEEEE)	Bra021258 (97/5B)	At3g17609 (88/5B)	HYH
	Bol041488	(SSSSTYRSSSSSDGGNPSDS)	Bra039631 (96/5A)	At2g18160 (83/5B)	GBF5
	Bol042729	(PSSPTSSSSLNYLNDLINNNNYSSSSN)	Bra025144 (97/5B)	At2g04038 (77/11)
	Bol043589	(SSLPASSLPSSSERSSSSAP)	Bra008976 (90/5A)	At5g11260 (87/5B)	HY5
Group 6A	Bol011719	G-rich doamin	Bra005287 (92/6A)	At2g36270 (78/6A)	ABI5
	Bol012142	G-rich doamin	Bra008192 (95/6A)	At1g75390 (61/11)
	Bol012855	G-rich doamin	Bra033719 (88/11)	At5g44080 (54/5B)
	Bol027732	G-rich doamin	Bra015847 (67/6A)
	Bol039324	G-rich doamin	Bra008192 (95/6A)	At1g75390 (61/11)
	Bol039895	G-rich doamin	Bra003755 (94/6A)	At1g75390 (76/11)
Group 6B	Bol044306	(GVVTETVTGGGGGGGGGLG)	Bra014668 (90/12)	At3g56850 (77/6B)	AREB3
Group 10	Bol005139	Transmembrane domain	Bra016959 (79/10)	At2g41070 (53/10)	DPBF4
	Bol006897	Transmembrane domain	Bra016959 (65/10)	At2g41070 (61/10)	DPBF4
	Bol023161	Transmembrane domain	Bra023224 (91/10)	At3g10800 (59/10)
	Bol044292	Transmembrane domain	Bra014680 (67/10)
Group 11	Bol001886		Bra000256 (82/11)	At2g42380 (75/4A)
	Bol004832		Bra004689 (98/4B)	At2g42380 (71/4A)
	Bol006077		Bra036251 (94/2B)	At4g02640 (71/2B)	BZO2H1
	Bol006975		Bra027855 (95/12)	At1g59530 (74/12)
	Bol007295		Bra038705 (99/11)	At3g12250 (92/11)	TGA6
	Bol008040		Bra031871 (86/12)	At5g65210 (77/12)	TGA1
	Bol008071		Bra031845 (94/12)
	Bol008240		Bra018250 (90/1A)	At1g06070 (62/1A)
	Bol009156		Bra033464 (93/4A)	At3g51960 (76/12)
	Bol010308		Bra034767 (98/11)	At3g12250 (94/11)	TGA6
	Bol010390		Bra019715 (94/11)	At1g13600 (87/11)
	Bol013680		Bra011545 (98/5B)	At4g34590 (81/5B)	ATB2/GBF6
	Bol013712		Bra011580 (87/12)	At4g35040 (61/4B)
	Bol016288		Bra027885 (96/1A)	At1g58110 (72/11)
	Bol016432		Bra020471 (98/11)	At5g24800 (84/5B)	BZO2H2
	Bol018688		Bra017735 (92/5B)	At4g35900 (67/5A)	FD-1
	Bol020032		Bra026523 (100/11)	At2g04038 (82/11)
	Bol020390		Bra000102 (88/11)
	Bol022397		Bra009793 (93/11)	At5g24800 (81/5B)	BZO2H2
	Bol024000		Bra004329 (97/11)	At1g68640 (87/11)	PAN
	Bol024526		Bra028713 (99/11)	At5g06960 (87/1A)	TGA5/OBF5
	Bol026864		Bra025743 (97/11)	At1g19490 (74/11)
	Bol028631		Bra038341 (97/12)	At1g68880 (73/12)
	Bol029580		Bra004550 (76/3A)	At2g46270 (79/3A)	GBF3
	Bol029939		Bra010504 (90/11)	At4g35900 (66/5A)	FD-1
	Bol031441		Bra026895 (98/11)	At1g13600 (84/11)
	Bol032575		Bra017395 (91/11)	At2g04038 (69/11)
	Bol033132		Bra020735 (97/11)	At3g30530 (82/11)
	Bol033486		Bra034925 (65/2B)	At1g42990 (55/10)
	Bol033853		Bra011485 (71/1A)	At4g34000 (55/1A)	ABF3
	Bol033489		Bra034916 (96/11)	At1g43700 (70/11)	VIP1
	Bol037803
	Bol034645		Bra034668 (98/11)	At4g35040 (76/4B)
	Bol034676		Bra034639 (98/11)	At4g34590 (78/5B)	ATB2/GBF6
	Bol035452		Bra001443 (99/11)	At3g12250 (93/11)	TGA6
	Bol038660		Bra022225 (96/12)	At3g17609 (83/5B)	HYH
	Bol041278		Bra019436 (93/11)	At3g44460 (80/12)	DPBF2
	Bol043902		Bra009241 (89/11)	At5g06950 (89/11)
Group 12	Bol004200		Bra007276 (84/12)	At3g56850 (88/6B)	AREB3
	Bol005146		Bra016953 (93/12)	At2g41070 (69/12)	DPBF4
	Bol006902		Bra004597 (93/12)	At2g41070 (69/12)	DPBF4
	Bol008830		Bra005971 (77/11)
	Bol009211		Bra024366 (98/12)	At5g65210 (89/12)	TGA1
	Bol010836		Bra003500 (98/12)	At3g62420 (78/12)
	Bol011683
	Bol012703		Bra037290 (95/12)	At2g16770 (73/12)
	Bol015239		Bra033649 (87/1A)	At5g42910 (43/11)
	Bol016052		Bra010722 (72/4B)
	Bol016607		Bra010035 (94/12)	At5g49450 (78/11)
	Bol017068		Bra013005 (93/12)	At5g60830 (60/12)
	Bol018082		Bra037533 (96/1A)	At3g19290 (91/1A)	ABF4/AREB2
	Bol019052		Bra037809 (95/12)	At5g65210 (86/12)	TGA1
	Bol021964		Bra036025 (64/12)	At3g49760 (64/12)
	Bol024636		Bra028604 (99/12)	At5g10030 (89/12)	TGA4
	Bol027526		Bra015646 (97/12)	At1g77920 (83/1B)	TGA7
	Bol032354		Bra010035 (80/12)	At5g49450 (76/11)
	Bol036259		Bra035957 (95/12)	At5g60830 (60/12)
	Bol037334		Bra036025 (93/12)	At3g49760 (64/12)
	Bol037733
	Bol042686		Bra013048 (89/12)	At2g16770 (71/12)
	Bol043053		Bra025418 (98/11)	At3g30530 (88/11)
	Bol043707		Bra009063 (97/12)	At5g10030 (85/12)	TGA4
	Bol043859		Bra009288 (97/12)
	Bol044413		Bra007274 (96/12)	At3g56850 (84/6B)	AREB3
	Bol044598		Bra007679 (98/12)	At3g62420 (88/12)
