# Supplementary material for: Genome-Wide Identification and Characterization of bZIP Transcription Factors in Brassica oleracea under Cold Stress
Source: Biomed Res Int. 2016 May 23;2016:4376598. doi: 10.1155/2016/4376598 (PMC4893578; doi:10.1155/2016/4376598)
Supplement: Supplementary file 1 — The supplementary materials contain 5 files, they are some important data supported to the methods and results of the presented study. These data make paper easier to read and understand. [file 4376598.f1.zip › Table S5_BolbZIP group 11.xlsx]

## Sheet: Group 11
		Number of LCRs	LCR-1	LCR-2	LCR-3	LCR-4	LCR-5
Group 11	Bol001886	1	SNNSGDSSSN
	Bol004832	3 (3-coiled coil)	DDNDLHNNPSHNNNNAGTTGSSSNTSTLSDHNS	DGAASNNNSGDSS	EALKREIERLREVYQQQSLKKMD
	Bol006077	2	VGNSNNNNNAIVGVSSA	SGSSRDYSDDDDLD
	Bol006975	1	LEFRLLELYRFL
	Bol007295	3	DTLSSGTLGSSSSD	MGQMAMAMGQ	SRLRALSSLWLARPR
	Bol008040	2	RREREIEEGKGKR	EEEAAEEAAEAA
	Bol008071	1	DDASDIFSIFDS
	Bol008240	2	SPAPSGGLPPPSPTPIG	SSTATSSAAA
	Bol009156	1	SHSHTCFHTHTH
	Bol010308	3	TLSSGTLGSSSS	MGQMAMAMGQ	SSRLRALSSLWLARPR
	Bol010390	1	NNNNNYSSSSN
	Bol013680	2	ESSSSGTTSSAIQTSSGSEE	NQMNMNMFHMMNQ
	Bol013712	2	HHQHQHQHQQ	GDGFGGGGNSQEGGGG
	Bol016288	2	QQQQQTQQ	SSKDLDSQFSSLSLNSKDSNSSRDSVSVTSQF
	Bol016432	2	LALQELLTKLL	SLTSSLNQLLQTHLS
	Bol018688	3	SSISSSSSPSHPQDSQSQKKS	SHNHHNQNSNS	PTIPTSLTISSSS
	Bol020032	1	KSNKNSDDDNN
	Bol020390	5	PPPPPSPPLSP	SSVPAGSSISSSS	VRSESSVSRTEEASS	SPAVSSVSDAPSLD	SGSDDSDDEDPDGE
	Bol022397	2	VRRRARRTASVSS	SLTSSLNQLLQTHLS
	Bol024000	3	TDTSTDIDTDD	LRQADLLRQQTLQQLHRILTTRQ	RLRALSSLWLARPR
	Bol024526	3 (1-coiled coil)	EQQSQDLNNLQESSQQAEDALSQGMD	SLQQSLSETLSSGTLGSSSS	SLRLRALSSLWLAR
	Bol026864	5	TSSCCSTSSS	AAANMTELEAAEALADLAQLA	KRVRKRVK	KSVKPETKEPEESPKPS	LAAAEARKRRKELTKLKNL
	Bol028631	1	NPNQQFFNNQVPLVN
	Bol029580	2	GPPLTTPGTPL	GNKNSGSGCNESNSSS
	Bol029939	4	PSISSSSSPSHS	HHLNHHSQHPQHNH	LVTSNSNLHSHNHLTNV	FIFISIFFS
	Bol031441	1	NNNNFYSSSSN
	Bol032575	1	ISSSSLNYLNDLIINNNYSLSSN
	Bol033132	1	NYINSSNPSPYPS
	Bol033486	2	DFLGEDDLFLDFDLSLF	LLLESLLLGSLLWYLG
	Bol033489	2	SFSVDSDSDFFDD	LQALQQQAELRDALNEALREELNRL
	Bol033853	3	GGGLSVGVGGEVGGCG	NFNGGFYGFGSNAGLG	IQAQPLQMQQRQQLIPKQ
	Bol037803	3	PKTLPPPPPSSQAYSSMPP	LGRGGSSLIGSLL	SSSSNNNN
	Bol034645	1	GNGNGSFNSSANASAS
	Bol034676	1	NQMNMNMFCMNQ
	Bol035452	3	DTLSSGTLGSSSSD	MGQMAMAMGQ	SSRLRALSSLWLARPR
	Bol038660	1	EESDEEELLMVLDME
	Bol041278	1	EENNGGGAGAQQ
	Bol043902	1	SSRLRALSSLWLARPR
